# Supplementary material
Source: Springer Nature journal article supplement (https://www.springermedizin.de/resource/supplementary/12889_2012_4981_MOESM6_ESM.pdf/9490592)

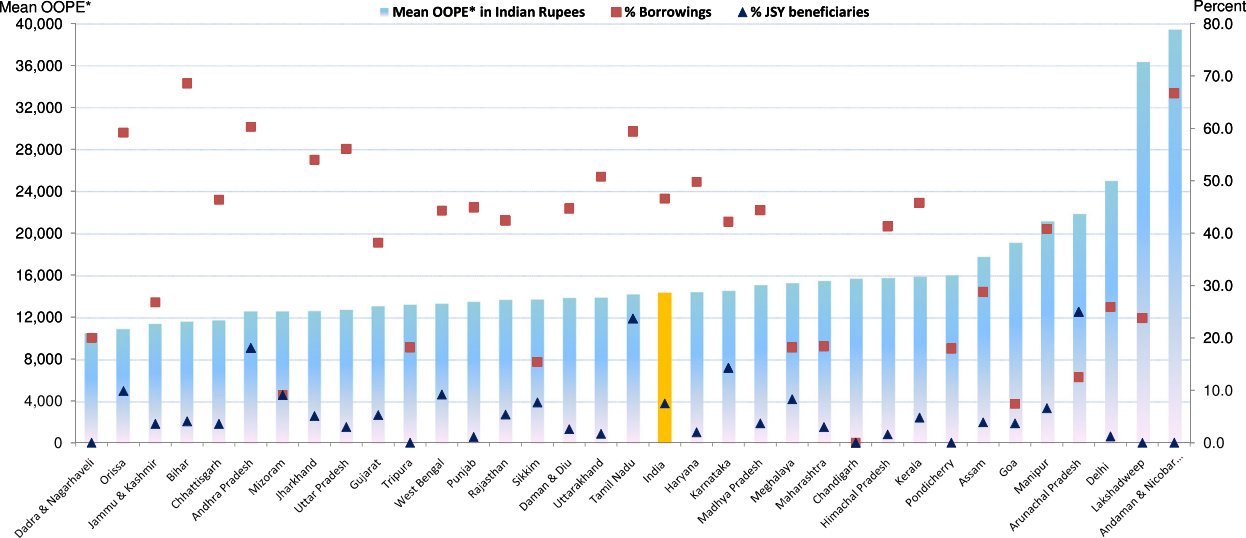

Supplement: MOESM6 [file 9490592]
